# Supplementary material
Source: PubMed Central journal article supplement (PMC1698263)
Supplement: 64347.f1.pdf [file 64347.f1.pdf]

## SUPPLEMENTARY DATA

**Supplementary Text.** Sequence and structure of RNAs used in this study. The sequence of mature miRNAs is indicated in **red**.

### Synthetic siRNA duplexes and ss siRNAs

- GFP siRNA  
5' -pGGCUACGUCCAGGAGCGCACC  
UCCGAUGCAGGUCCUCGCGUp-5'
- CLP ss siRNA  
5' -pAAAUUCUGUACGACCUCUdtdt
- Dicer ss siRNA  
5' -pUCCAGAGCUGCUUCAAGCAdtdt
- Rluc siRNA (siRluc)  
5' -pGGCCUUUCACUACUCCUACdtdt  
dtdtCCGGAAAGUGAUGAGGAUGp-5'
- Ctl siRNA  
5' -pGUAUAAUACACCGCGCUACdtdt  
dtdtCAUAUUAUGUGGCGCGAUGp-5'
- Rluc antisense ss siRNA (asRluc)  
5' -pGUAGGAGUAGUGAAAGGCCdtdt
- Ctl antisense ss siRNA  
5' -pGUAGCGCGGUGUAUUAUACdtdt

### Synthetic pre-miRNAs, miRNA:miRNA\* duplexes and miRNAs

- pre-hsa-miR-31  
5' -GGCAA AUG UGGCAUAGC GUU C  
CCGUU UAC ACCGUAUCG CAA U  
3' -UA A A UC GGG  
G C -U GAA
- hsa-miR-31  
5' -pGGCAAGAUGCUGGCAUAGCUG
- cel-let-7  
5' -pUGAGGUAGUAGGUUGUAUAGUU
- hsa-miR-196-1 miRNA:miRNA\*

```

      A   A   C
5' -pU GGU GUUU AUGUUGUUGG
3' -UAG CCA CAAA UACAACAAP
      C   C   U

```

- hsa-miR-196-1

```
5' -pUAGGUAGUUUCAUGUUGUUGG
```

### psiSTRIKE-derived shRNAs and pre-miRNA

- Rluc shRNA

```

                                     CUUC
5' -GGCCUUUCACUACUCCUAC          C
3' -UUCCGGAAAGUGAUGAGGAUG      U
                                     ACUG

```

- Control shRNA

```

                                     CUUC
5' -GUAUAAUACACCGCGCUAC          C
3' -UUCAUAUUAUGUGGCGCGAUG      U
                                     ACUG

```

### Target RNAs (synthesized by *in vitro* transcription)

- CLP RNA target (104 nt, CLP nt 414-514)

```
5' -GGGCUGCAGCGCGCCAAAACCGGGACGGACAAGACCCUGGUGAAGGAGGUCGUAC
AGAAUUUCGCUAAGGAGUUUGUGAUCAGUGAUCGGAAGGAGCUGGAGGA
```

- Dicer RNA target (104 nt, Dicer nt 294-394)

```
5' -GGGCAUGAUAACAUUUAUACGCCAAGAAAAUAUCAGGUUGAACUGCUUGAAGCAG
CUCUGGAUCAUAUACCAUCGUCUGUUUAAACACUGGCUCAGGGAAGAC
```

- *lin-41* RNA target

```
5' -GGGGCACCAACTCAAGTATACCTTTTATACAACCGTTCTACTCAACGCGATGT
AAATATCGCAA
```

- *HOXB8* RNA target

```
5' -GGGCCGATTTCTGCTAAGTTCTCCCAACAACATGAAACTGCCTATTCACGCCG
TAATTCTTTCT
```

The first 3 G's are incorporated by the T7 polymerase during transcription. The siRNA/miRNA binding sites are underlined.

### miRNA:target base pairing

- cel-let-7:*lin-41*

cel-let-7

*lin-41* RNA target

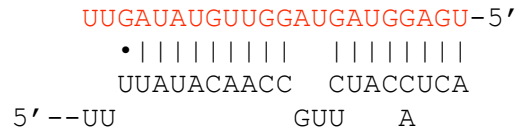

• hsa-miR-196-1:*HOXB8*

hsa-miR-196-1

*HOXB8* RNA target

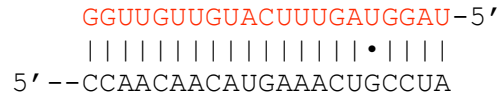

siRNA:target base pairing

All the siRNA:target combinations are perfectly complementary.
