# Supplementary material
Source: PubMed Central journal article supplement (PMC1698263)
Supplement: 64347.f2.pdf [file 64347.f2.pdf]

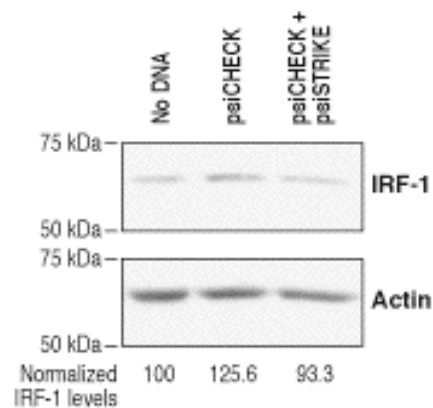

**Supplementary Figure S1.** Expression of shRNA had no effect on interferon regulatory factor-1 (IRF-1) protein expression. *Fmr1* KO cells, grown in 24-well plates, were transfected with psiCHECK (0.8  $\mu$ g) without or with psiSTRIKE-Rluc (0.8  $\mu$ g), or no DNA, and expression of IRF-1 was assessed by Western blot using anti-IRF-1 C-20 antibody (Santa Cruz Biotechnology). Actin was detected with anti-actin AC-40 antibody (Sigma). Results were analyzed by Alphamaging and normalized.
